# Supplementary material for: Targeting innate immunity for tuberculosis vaccination
Source: JCI journal article supplement (doi:10.1172/jci128877), 2019-09-02
Supplement: sd1 [file 1]

**Bill and Melinda Gates Foundation**  
**Collaboration for TB Vaccine Discovery Innate Immunity Working Group**

**1. Shabaana A. Khader**

Department of Molecular Microbiology, Washington University School of Medicine in St. Louis, 660 South Euclid Avenue, St. Louis, MO, 63110-1093

**2. Mihai G. Netea**

Department of Internal Medicine and Radboud Center for Infectious Diseases, Radboud University Medical Center, Nijmegen, Netherlands

Department for Genomics & Immunoregulation, Life and Medical Sciences Institute (LIMES), University of Bonn, 53115 Bonn, Germany

**3. Maziar Divangahi**

Meakins-Christie Laboratories, Department of Medicine, Department of Microbiology and Immunology, Department of Pathology, McGill International TB Centre, McGill University Health Centre, 1001 Decarie Boulevard, Montreal, QC H4A 3J1, Canada

**4. Philip C. Hill**

Centre for International Health, Department of Preventive and Social Medicine, University of Otago Medical School, Dunedin, New Zealand

**5. Markus Maeurer**

Department of Oncology/Haematology, KHNW, Frankfurt, Germany & ImmunoSurgery Unit, Champalimaud Foundation, Lisbon, Portugal

**6. Katrin D. Mayer-Barber,**

Inflammation and Innate Immunity Unit, Laboratory of Clinical Immunology and Microbiology, National Institute of Allergy and Infectious Diseases, National Institutes of Health, 33 North Drive, Bethesda, MD 20892

**7. Musa M Mhlanga**

Division of Chemical Systems & Synthetic Biology  
Institute for Infectious Disease & Molecular Medicine (IDM)  
Faculty of Health Sciences, Department of Integrative Biomedical Sciences, University of Cape Town, Cape Town South Africa

**8. Elisa Nemes**

South African Tuberculosis Vaccine Initiative, Institute of Infectious Disease & Molecular Medicine and Division of Immunology, Department of Pathology, University of Cape Town, Cape Town, South Africa

**9. Larry S. Schlesinger**

Texas Biomedical Research Institute, 8715 W Military Drive, San Antonio, TX 78245

**10. Reinout van Crevel**

Department of Internal Medicine and Radboud Center for Infectious Diseases, Radboud University Medical Center, Nijmegen, Netherlands

**11. Ramakrishna Vankalayapati**

Department of Pulmonary Immunology, Center for Biomedical Research, University of Texas Health Science Center at Tyler, 11937 U.S. Highway 271, Tyler, TX, 75708

**12. Ramnik J Xavier**

Broad Institute of MIT and Harvard, 415 Main Street, Cambridge, MA, 02142; Center for Computational and Integrative Biology, Massachusetts General Hospital and Harvard Medical School, 185 Cambridge Street, Boston, MA, 02114; Gastrointestinal Unit and Center for the Study of Inflammatory Bowel Disease, Massachusetts General Hospital and Harvard Medical School, 185 Cambridge Street, Boston, MA, 02114; Center for Microbiome Informatics and Therapeutics, Massachusetts Institute of Technology, 77 Massachusetts Avenue, Cambridge, MA, 02139
